# Supplementary material
Source: HighWire-hosted journal article supplement (https://jnm.snmjournals.org/highwire/filestream/95287/field_highwire_adjunct_files/0/195347_Supplemental_Data.pdf)
Supplement: 195347_Supplemental_Data.pdf [file 195347_Supplemental_Data.pdf]

**Supplemental Fig 1.** Percentage errors of the TIACs introduced for protocols with a reduced number of imaging time points (indicated as hours p.i) compared to the original six time point protocol (2, 4, 8, 24, 96 and 168 hours p.i.). The numbers in brackets are the included time points in units of hours p.i. The integral is calculated as described in the article. Largest errors across patient 1-5 are shown. The color scale reflects the magnitude of the error from -10 to 10 %. Error above 10 % or undefined integrals are written as “>10 %” Protocol (2, 24, 96 and 168 hours p.i.) was chosen for arm 2. An interactive figure can be found as Supplementary file 2.

|        |                         |                      |                |                   |                   |               |                      |                   |               |            |             |
|--------|-------------------------|----------------------|----------------|-------------------|-------------------|---------------|----------------------|-------------------|---------------|------------|-------------|
| Liver  | 0.0%                    | 0.1%                 | -0.8%          | -0.2%             | 0.2%              | -2.8%         | -0.0%                | -0.5%             | -2.8%         | < -10%     | < -10%      |
| Spleen | 0.0%                    | 0.4%                 | 1.9%           | 0.6%              | 1.0%              | -8.4%         | -0.3%                | 0.9%              | -8.4%         | -5.3%      | < -10%      |
| Kidney | 0.0%                    | -0.2%                | 0.5%           | -0.3%             | 0.3%              | -4.6%         | 0.1%                 | 0.6%              | -4.6%         | < -10%     | >10%        |
| WB     | 0.0%                    | -0.6%                | -5.5%          | -2.1%             | -1.0%             | -1.2%         | -0.6%                | -1.1%             | -1.2%         | < -10%     | < -10%      |
|        | [2, 4, 8, 24, 96, 168 ] | [4, 8, 24, 96, 168 ] | [24, 96, 168 ] | [8, 24, 96, 168 ] | [4, 24, 96, 168 ] | [2, 96, 168 ] | [2, 8, 24, 96, 168 ] | [2, 24, 96, 168 ] | [2, 96, 168 ] | [96, 168 ] | [2, 4, 8, ] |
